# Supplementary material
Source: PubMed Central journal article supplement (PMC3605816)
Supplement: cn3001334_si_001.pdf [file cn3001334_si_001.pdf]

| <b>AF Peptide</b> | <b>Amino Acid Sequence</b> | <b>Transcript</b> |
|-------------------|----------------------------|-------------------|
| AF1               | KNEFIRFa                   | <i>afp-7</i>      |
| AF2               | KHEYLRFa                   | <i>afp-4</i>      |
| AF3               | AVPGVLRFa                  | <i>afp-1</i>      |
| AF4               | GDVPGVLRFa                 | <i>afp-1</i>      |
| AF5               | SGKPTFIRFa                 | <i>afp-2</i>      |
| AF6               | FIRFa                      |                   |
| AF7               | AGPRFIRFa                  |                   |
| AF8               | KSAYMRFa                   | <i>afp-3</i>      |
| AF9               | GLGPRPLRFa                 |                   |
| AF10              | GFGDEMSMPGVLRFa            | <i>afp-1</i>      |
| AF11              | SDIGISEPNFLRFa             | <i>afp-11</i>     |
| AF13              | SDMPGVLRFa                 | <i>afp-1</i>      |
| AF14              | SMPGVLRFa                  | <i>afp-1</i>      |
| AF15              | AQTFVRFa                   | <i>afp-9</i>      |
| AF16              | ILMRFa                     | <i>afp-10</i>     |
| AF17              | DFDRDFMHFa                 | <i>afp-5</i>      |
| AF18              | NKFFLRKP                   |                   |
| AF19              | AEGLSSPLIRFa               | <i>afp-13</i>     |
| AF20              | GMPGVLRFa                  | <i>afp-1</i>      |
| AF21              | AMRNALVRFa                 | <i>afp-6</i>      |
| AF22              | NGAPQPFVRFa                | <i>afp-6</i>      |
| AF23              | SGMRNALVRFa                | <i>afp-6</i>      |
| AF24              | RNKFEFIRFa                 | <i>afp-8</i>      |
| AF25              | NNFLRFa                    | <i>afp-11</i>     |
| AF26              | KPNFLRFa                   | <i>afp-11</i>     |
| AF27              | PADPNFLRFa                 | <i>afp-11</i>     |
| AF28              | SAEPNFLRFa                 | <i>afp-11</i>     |
| AF29              | NAEPNFLRFa                 | <i>afp-11</i>     |
| AF30              | APNKILMRFa                 | <i>afp-10</i>     |
| AF31              | TPSNNFLRFa                 | <i>afp-11</i>     |
| AF32              | GSDPNFLRFa                 | <i>afp-11</i>     |
| AF33              | SNQAQNFLRFa                | <i>afp-11</i>     |
| AF34              | DSKLM DPLIRFa              | <i>afp-13</i>     |
| AF35              | DPQQRIVTDETVLRFa           | <i>afp-13</i>     |
| AF36              | VPSAADMMIRFa               | <i>afp-12</i>     |
| AF37              | FRGEPIRFa                  |                   |
| AF38              | AQREPIRFa                  |                   |
| AF39              | SPKQKFIRFa                 |                   |
| AF41              | KPNFIRFa                   | <i>afp-11</i>     |

Supplementary Table S1. *Ascaris* FMRFamide-like peptides (AF peptides). When known, peptide transcripts are given in the 3<sup>rd</sup> column. (1-11)



|        |       |       |       |       |       |       |       |       |       |       |       |       |
|--------|-------|-------|-------|-------|-------|-------|-------|-------|-------|-------|-------|-------|
|        |       |       | 612.5 |       |       |       |       | 612.3 |       |       |       |       |
|        | 617.1 |       |       |       |       |       | 617.1 | 617.1 |       |       |       |       |
|        | 618.1 |       |       |       |       |       |       |       |       |       |       |       |
|        | 622.1 | 622.0 | 622.0 |       |       | 622.0 | 622.1 | 622.1 |       |       |       | 622.1 |
|        |       |       |       |       |       | 628.0 |       |       |       |       |       |       |
|        | 630.1 | 630.0 | 630.0 |       |       | 630.0 | 630.1 | 630.1 |       | 630.1 | 630.1 |       |
|        |       | 632.0 | 632.0 |       |       | 632.0 |       | 632.1 |       | 632.1 | 632.1 |       |
|        |       |       | 638.6 |       |       |       |       |       |       |       |       |       |
|        |       |       | 640.5 | 640.5 |       |       |       |       |       |       |       |       |
|        | 644.1 |       |       |       |       | 644.0 |       |       |       |       |       |       |
|        | 647.9 |       |       |       |       |       |       | 648.0 |       | 648.0 | 648.1 |       |
|        |       |       |       |       |       |       |       | 650.0 |       | 650.0 | 650.1 |       |
|        |       |       |       |       |       |       |       | 654.3 |       | 654.3 | 656.1 |       |
|        |       |       | 656.0 |       |       |       |       | 656.2 |       |       | 660.3 |       |
|        | 660.0 |       |       |       |       |       |       |       | 660.2 | 660.2 | 666.1 |       |
|        |       |       | 666.6 |       |       |       |       |       |       |       |       |       |
|        |       |       | 668.6 | 668.6 |       |       |       |       |       |       |       |       |
|        |       |       |       |       |       |       |       | 676.1 |       |       |       | 676.1 |
|        |       |       |       |       |       |       | 678.6 |       |       | 678.5 | 678.5 |       |
|        |       |       |       |       |       |       | 682.1 |       |       |       |       |       |
|        |       |       |       |       |       |       |       | 692.0 |       | 692.0 | 692.1 |       |
|        |       |       | 693.9 |       |       |       |       | 694.0 |       | 694.0 | 694.1 |       |
|        | 695.4 | 695.4 | 695.4 | 695.4 | 695.3 | 695.4 |       | 695.4 | 695.4 | 695.4 | 695.5 |       |
|        |       |       |       |       | 696.3 |       |       |       |       | 696.4 |       | 696.1 |
|        |       |       |       |       |       |       |       | 698.1 |       |       |       |       |
|        |       |       |       |       |       |       |       | 706.6 |       |       |       |       |
|        |       |       |       |       |       |       |       |       |       |       |       | 746.0 |
|        |       |       |       |       |       |       |       |       |       |       |       | 748.0 |
|        |       |       |       |       |       |       |       | 784.7 |       |       |       |       |
|        |       |       |       |       |       |       |       | 786.7 |       | 786.6 | 786.6 |       |
|        |       |       |       |       |       |       |       | 788.7 |       | 788.6 | 788.6 |       |
|        | 792.5 | 792.4 |       |       | 792.4 | 792.4 |       |       |       | 792.4 |       |       |
| AF25   | 809.5 | 809.4 | 809.4 | 809.4 | 809.4 | 809.4 | 809.6 | 809.6 | 809.4 | 809.4 | 809.5 | 809.5 |
|        |       |       |       |       |       |       |       | 810.5 |       |       |       |       |
|        |       |       |       |       |       |       |       |       | 817.8 |       |       |       |
| AF25Na |       | 831.4 | 831.4 |       |       | 831.4 |       |       | 831.4 |       |       | 831.5 |
|        | 833.1 |       |       |       |       | 833.1 |       |       |       |       |       |       |
|        |       |       |       |       | 839.4 |       |       |       |       | 839.5 |       |       |
|        | 844.1 |       |       |       |       |       |       |       |       |       |       |       |
|        |       |       |       |       |       | 851.4 |       |       |       |       |       |       |
|        | 855.1 |       |       |       |       | 855.0 |       |       |       |       |       |       |
|        | 856.1 |       |       |       |       |       |       |       |       |       |       |       |
|        | 857.4 |       |       |       |       |       |       |       |       |       |       |       |
|        | 860.1 |       |       |       |       |       |       |       |       |       |       |       |
|        |       |       |       |       |       |       |       |       |       |       |       | 861.2 |
|        |       | 863.3 |       |       |       | 863.4 |       |       |       |       |       |       |

|           |        |        |        |        |        |        |        |        |        |        |        |        |
|-----------|--------|--------|--------|--------|--------|--------|--------|--------|--------|--------|--------|--------|
|           |        |        |        |        |        |        |        | 865.2  |        |        |        |        |
|           |        |        |        |        |        |        |        | 867.6  |        | 867.4  |        |        |
| AF25Cu    | 871.1  | 871.4  | 871.4  |        |        | 871.3  |        |        | 871.4  | 871.4  | 871.4  | 871.5  |
|           |        |        |        |        |        | 872.5  |        |        |        |        | 873.4  |        |
|           | 873.1  | 873.3  |        |        |        |        |        |        | 873.3  | 873.4  |        |        |
|           |        |        | 877.0  |        |        |        |        |        |        |        |        | 877.1  |
|           |        |        |        |        |        |        | 893.2  |        |        |        |        |        |
| AF31'     | 896.5  | 896.5  | 896.5  | 896.5  | 896.5  | 896.5  |        | 896.6  | 896.5  | 896.5  | 896.5  | 896.6  |
|           |        |        |        |        | 898.5  |        |        |        |        |        |        |        |
|           |        | 902.5  | 902.5  |        | 902.5  | 902.5  |        |        | 902.5  |        | 902.5  |        |
|           | 905.7  | 905.5  |        |        | 905.5  | 905.5  |        |        |        | 905.7  |        |        |
|           |        |        |        |        | 913.5  | 913.5  |        |        |        |        |        |        |
| AF26/41   | 920.6  | 920.5  | 920.6  | 920.6  | 920.5  | 920.5  | 920.7  | 920.7  | 920.5  | 920.5  | 920.6  | 920.6  |
| AF26/41Na | 942.6  | 942.5  | 942.5  | 942.5  | 942.5  | 942.5  | 942.7  |        | 942.5  | 942.5  | 942.5  | 942.6  |
|           | 958.5  | 958.5  |        |        | 958.5  | 958.5  | 958.7  |        |        |        |        |        |
|           |        |        |        |        | 962.5  | 962.6  |        |        |        |        |        |        |
|           | 974.5  | 974.5  |        |        | 974.5  | 974.5  |        | 974.6  |        |        |        | 974.6  |
|           | 978.6  |        |        |        | 978.5  | 978.6  |        | 978.7  |        | 978.6  |        |        |
| AF26/41Cu | 982.5  | 982.5  | 982.5  |        | 982.5  | 982.5  |        |        | 982.5  | 982.5  | 982.5  | 982.6  |
|           |        | 984.5  | 984.5  |        | 984.5  | 984.5  |        |        | 984.5  | 984.5  | 984.5  | 984.6  |
| AF2       | 991.6  | 991.6  | 991.6  |        | 991.5  | 991.6  |        | 991.7  |        | 991.5  |        | 991.6  |
|           |        |        |        |        |        | 1004.6 |        |        |        |        |        |        |
|           |        |        |        |        | 1024.6 | 1024.6 |        |        |        |        | 1024.5 | 1024.7 |
|           | 1044.1 |        |        |        |        |        |        |        |        |        |        |        |
|           |        |        |        |        |        |        |        |        |        |        | 1046.4 |        |
| AF32      | 1051.6 | 1051.5 | 1051.5 | 1051.6 | 1051.5 | 1051.5 | 1051.7 | 1051.7 | 1051.5 | 1051.5 | 1051.5 | 1051.6 |
|           | 1056.5 |        |        |        | 1056.5 | 1056.5 |        |        |        | 1056.5 | 1056.5 |        |
|           | 1060.1 |        |        |        |        |        |        |        |        |        |        |        |
|           |        |        |        |        | 1063.6 |        |        |        |        |        |        |        |
|           | 1068.5 | 1068.5 |        |        | 1068.4 | 1068.5 |        |        | 1068.4 | 1068.4 |        |        |
| AF27      | 1075.6 | 1075.6 | 1075.6 | 1075.6 | 1075.6 | 1075.6 | 1075.7 | 1075.7 | 1075.6 | 1075.5 | 1075.6 | 1075.7 |
| AF28      | 1079.6 | 1079.6 | 1079.6 | 1079.6 | 1079.6 | 1079.6 | 1079.7 | 1079.7 | 1079.5 | 1079.5 | 1079.6 | 1079.7 |
| PepNY     | 1086.5 | 1086.5 | 1086.5 | 1086.5 | 1086.5 | 1086.5 | 1086.6 | 1086.6 | 1086.4 | 1086.4 | 1086.5 | 1086.5 |
| AF31      | 1094.6 | 1094.6 | 1094.6 | 1094.6 | 1094.6 | 1094.6 | 1094.7 | 1094.7 | 1094.6 | 1094.6 | 1094.6 | 1094.7 |
|           |        |        | 1097.6 |        |        |        |        |        |        |        |        |        |
| AF28Na    |        |        | 1101.6 | 1101.6 |        |        |        |        | 1101.5 |        |        |        |
| AF29      | 1106.6 | 1106.6 | 1106.6 | 1106.6 | 1106.6 | 1106.6 | 1106.7 | 1106.7 | 1106.6 | 1106.6 | 1106.6 | 1106.7 |
| AF32Cu    |        | 1113.5 |        |        | 1113.5 | 1113.5 |        |        |        | 1113.4 | 1113.5 |        |
| AF31Na    |        | 1116.6 | 1116.6 | 1116.6 | 1116.6 |        |        |        | 1116.5 |        | 1116.6 | 1116.7 |
|           | 1117.6 |        |        |        | 1117.5 | 1117.6 | 1117.7 |        |        |        |        |        |
|           |        |        |        |        |        |        |        |        |        |        | 1118.6 |        |
|           |        |        |        |        | 1121.6 | 1121.6 |        |        |        |        |        |        |
|           |        |        |        |        |        | 1124.4 |        |        |        |        |        |        |
| AF29Na    |        | 1128.6 | 1128.6 | 1128.6 | 1128.6 | 1128.5 |        |        | 1128.5 |        | 1128.6 | 1128.7 |
|           | 1129.6 | 1129.5 |        |        |        | 1129.5 |        | 1129.7 |        |        |        |        |
|           |        |        |        |        | 1132.5 |        | 1132.7 |        |        |        |        |        |
|           | 1133.6 | 1133.5 | 1137.5 |        |        | 1133.6 |        | 1133.7 |        | 1133.5 |        |        |

|           |        |        |        |        |        |        |        |        |        |        |        |        |
|-----------|--------|--------|--------|--------|--------|--------|--------|--------|--------|--------|--------|--------|
|           |        |        |        |        |        | 1136.6 |        |        |        |        |        |        |
| AF27Cu    |        | 1137.5 |        |        |        |        |        | 1137.7 |        | 1137.5 | 1137.5 | 1137.6 |
|           |        | 1139.5 |        |        |        |        |        |        |        |        |        |        |
|           |        | 1140.4 |        |        |        | 1140.4 |        | 1140.5 |        |        |        |        |
| AF28Cu    |        | 1141.5 |        |        |        | 1141.5 |        |        |        | 1141.5 | 1141.5 | 1141.6 |
|           |        |        |        |        |        |        |        |        |        | 1143.5 | 1143.5 |        |
|           | 1144.6 | 1144.5 |        |        | 1144.5 | 1144.6 |        |        |        |        |        |        |
| PepNYCu   |        | 1148.4 |        |        |        | 1148.6 |        |        |        |        | 1148.4 |        |
|           |        |        |        |        |        |        |        |        |        |        |        |        |
|           |        |        |        |        |        |        |        | 1152.8 |        | 1152.6 |        |        |
|           |        |        |        |        | 1155.6 |        |        |        |        |        |        |        |
| AF31Cu    |        | 1156.5 | 1156.5 |        |        | 1156.5 |        |        | 1156.5 | 1156.5 | 1156.5 | 1156.6 |
|           | 1157.0 |        |        |        |        |        |        |        |        |        |        |        |
|           |        | 1158.5 |        |        |        |        |        |        | 1158.5 | 1158.5 | 1158.5 |        |
|           |        |        | 1159.5 |        |        |        |        |        |        |        |        |        |
|           |        | 1160.5 |        |        |        | 1160.5 |        | 1160.7 |        |        |        | 1160.6 |
|           |        | 1162.1 |        |        |        | 1162.6 |        |        |        |        |        |        |
|           |        |        |        |        |        |        |        | 1164.8 |        | 1164.6 |        |        |
| AF29Cu    |        | 1168.5 |        |        | 1168.5 | 1168.5 |        |        |        | 1168.5 | 1168.5 | 1168.6 |
|           |        | 1170.5 |        |        |        |        |        |        |        | 1170.5 | 1170.5 |        |
|           |        |        |        |        |        | 1171.5 |        |        |        |        |        |        |
|           |        |        |        |        |        | 1175.6 |        |        |        |        |        |        |
|           |        |        |        |        | 1183.6 |        |        |        |        |        |        |        |
|           | 1206.7 | 1206.6 |        |        | 1206.6 | 1206.6 |        |        |        | 1206.6 |        |        |
|           |        |        |        |        | 1210.6 |        |        |        |        |        |        |        |
| AF33      | 1223.7 | 1223.6 | 1223.7 | 1223.7 | 1223.6 | 1223.7 | 1223.8 | 1223.8 | 1223.6 | 1223.6 | 1223.6 | 1223.7 |
|           |        |        |        |        |        |        |        |        |        |        | 1235.6 |        |
| AF33Na    | 1245.7 | 1245.6 | 1245.6 | 1245.6 | 1245.6 | 1245.6 |        |        | 1245.6 | 1245.6 | 1245.6 | 1245.7 |
|           | 1261.7 |        |        |        | 1261.6 |        | 1261.8 |        |        | 1261.6 |        |        |
|           |        |        |        |        | 1265.6 | 1265.7 |        |        |        |        |        |        |
|           |        |        |        |        |        | 1277.6 |        |        |        |        |        |        |
|           |        |        |        |        |        |        |        |        |        | 1280.6 |        |        |
|           |        |        |        |        |        |        |        | 1281.8 |        |        |        |        |
| AF33Cu    |        | 1285.6 | 1285.6 |        |        | 1285.6 |        |        | 1285.5 | 1285.5 | 1285.5 | 1285.7 |
|           |        | 1287.6 |        |        |        |        |        |        |        | 1287.5 | 1287.5 |        |
|           | 1300.1 |        |        |        |        |        |        |        |        |        |        |        |
|           |        |        |        |        | 1327.7 | 1327.7 |        |        |        |        | 1327.6 |        |
| AF11I3V   |        |        |        |        |        | 1479.8 |        |        |        |        |        |        |
| AF11      | 1493.8 | 1493.8 | 1493.8 | 1493.8 | 1493.8 | 1493.8 | 1494.0 | 1494.0 | 1493.8 | 1493.7 | 1493.8 | 1493.9 |
| AF11I3VNa |        |        |        |        |        | 1501.8 |        |        |        |        |        |        |
|           |        |        |        |        |        |        |        |        |        | 1505.7 |        |        |
| AF11Na    |        | 1515.8 | 1515.8 | 1515.8 | 1515.8 |        |        |        |        | 1515.7 |        |        |
|           |        |        |        |        |        | 1517.8 |        |        |        |        |        |        |
|           |        |        |        |        |        | 1521.8 |        |        |        |        |        |        |
|           |        | 1531.7 |        |        | 1531.8 | 1531.8 |        |        |        |        |        |        |
|           |        |        |        |        |        | 1535.8 |        |        |        |        |        |        |

|        |        |        |  |        |        |        |        |        |        |        |        |        |
|--------|--------|--------|--|--------|--------|--------|--------|--------|--------|--------|--------|--------|
|        |        | 1547.7 |  |        |        |        |        |        |        |        |        |        |
|        |        |        |  |        |        |        |        | 1552.0 |        |        |        |        |
| AF11Cu |        | 1555.7 |  |        |        |        |        |        | 1555.7 |        | 1555.8 |        |
|        |        |        |  |        | 1597.8 |        |        |        |        |        |        |        |
| AF32*  | 2092.4 | 2092.2 |  | 2092.2 | 2092.2 | 2092.2 | 2092.3 | 2092.3 |        | 2092.2 | 2092.2 | 2092.4 |
|        |        |        |  |        |        | 2134.2 |        |        |        |        |        |        |
| AF26*  | 2144.3 | 2144.1 |  |        | 2144.1 | 2144.1 |        |        |        | 2144.1 |        |        |
|        |        |        |  |        |        |        |        |        |        |        |        |        |
|        |        |        |  |        |        |        |        |        |        | 2226.3 |        |        |
|        |        |        |  |        | 2289.2 |        |        |        |        | 2289.2 |        |        |
|        |        | 2303.2 |  |        |        |        |        |        |        |        |        |        |
|        | 2305.5 | 2305.3 |  |        | 2305.2 | 2305.3 |        |        |        | 2305.3 |        |        |
|        | 2321.5 | 2321.2 |  | 2321.2 | 2321.2 | 2321.2 | 2321.3 | 2321.4 |        | 2321.2 |        | 2321.5 |
|        |        |        |  |        |        |        |        |        |        |        |        |        |
|        |        | 2375.1 |  |        |        | 2375.1 |        |        |        |        |        |        |
|        |        | 2383.1 |  |        |        | 2383.1 |        |        |        | 2383.2 |        |        |
|        |        |        |  |        |        |        |        |        |        |        |        |        |
|        |        |        |  |        | 2457.3 | 2457.4 |        |        |        | 2457.4 |        |        |
| AF33*  | 2485.7 | 2485.4 |  | 2485.4 | 2485.4 | 2485.4 |        |        |        | 2485.5 |        | 2485.7 |
|        |        | 2810.4 |  |        | 2810.4 | 2810.4 |        |        |        |        |        | 2810.9 |
|        |        | 2832.4 |  | 2832.5 | 2832.4 |        |        |        |        |        |        |        |
|        |        | 2872.4 |  |        |        | 2872.4 |        |        |        |        |        |        |

Supplemental Table S2. Peak lists from 5 unmodified, 1 acetylated, and 6 methylene blue-treated AVKs. Relative peak height is indicated by 3 intensities of color; the highest intensity peaks are indicated by the darkest color, and lowest intensity peaks are indicated by the lightest color. O, oxygen; Na, sodium; Cu, copper; \*, extended form of peptide. a: acetylated; b: treated with Methylene Blue

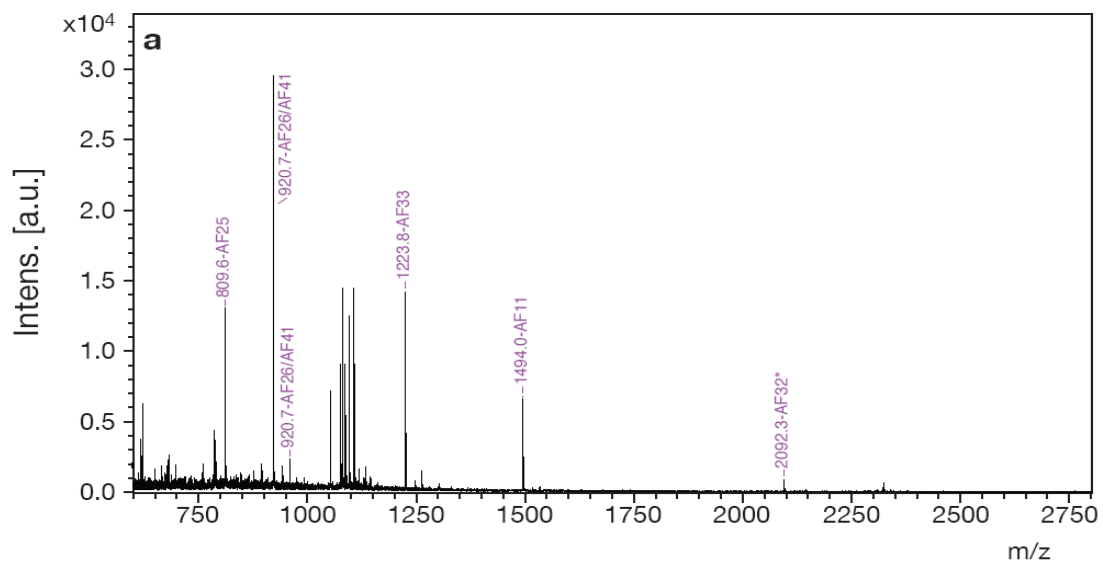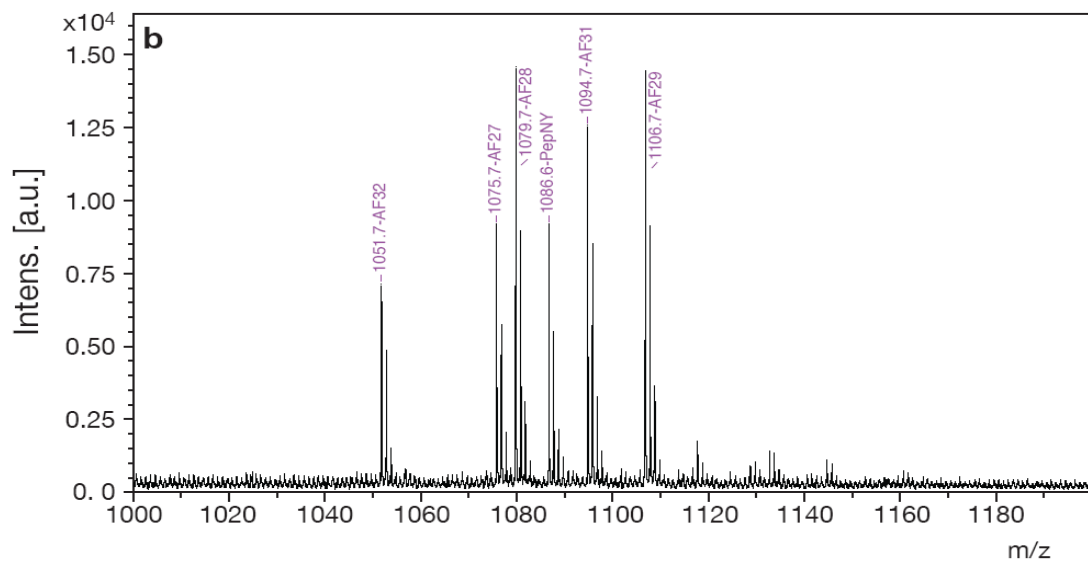

Supplemental Figure S1. Mass spectrum of oxidized AVK neuron. a) Spectrum from an individual AVK stained with methylene blue, which oxidizes methionines and adds 16 mass units. b) Expansion of (a) from  $m/z$  1000-2000. X axis:  $m/z$  is mass-to-charge ratio. Y axis is intensity of MS signal in arbitrary units, a.u.



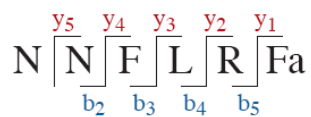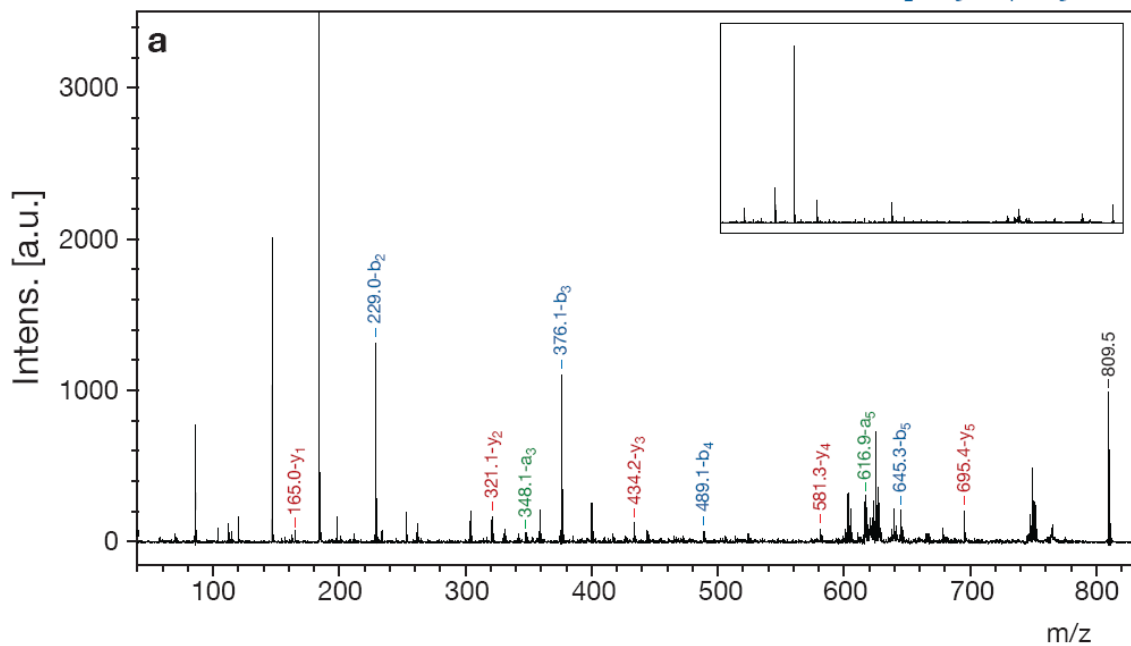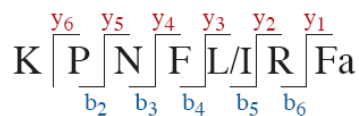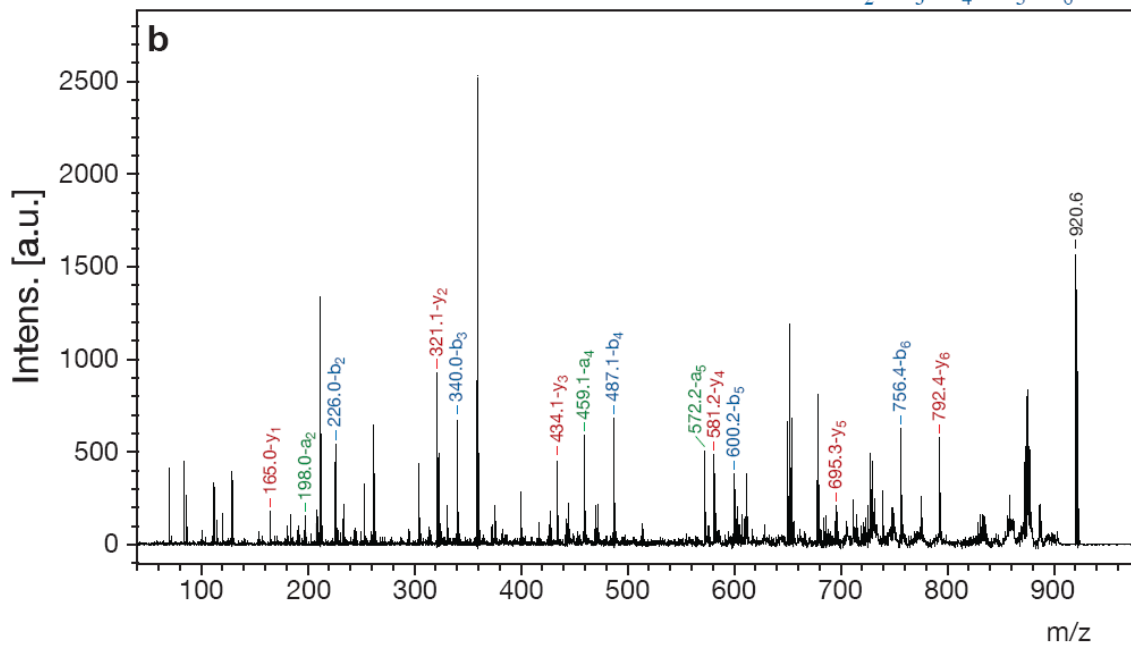

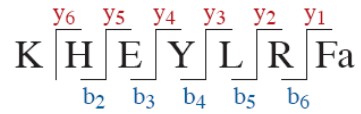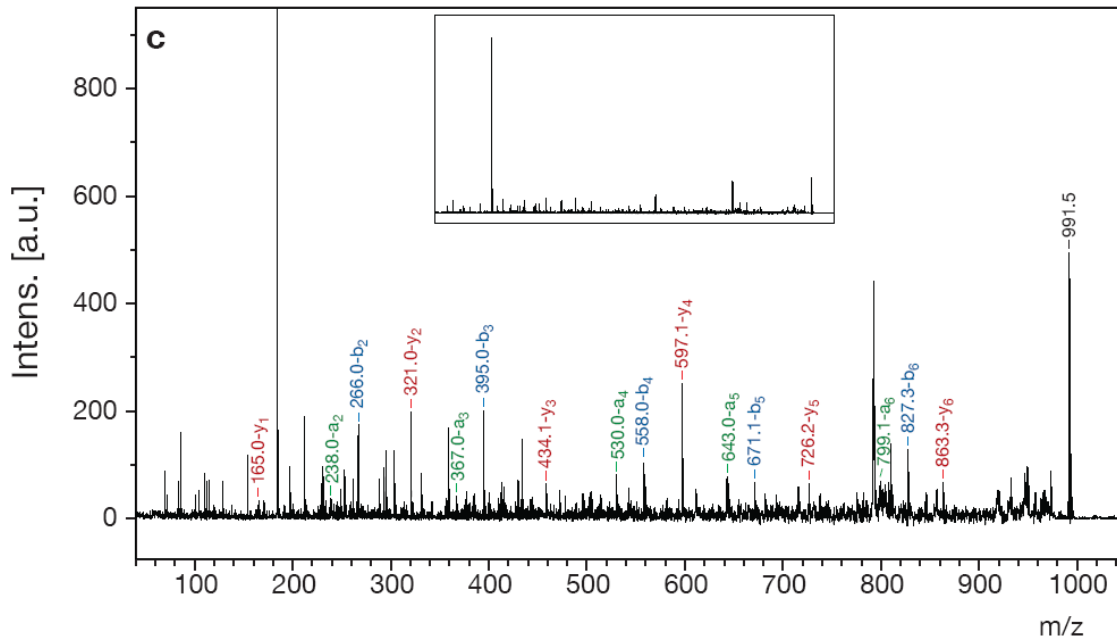

Supplemental Figure S2. MS/MS of previously identified AF peptides from AVK. Peaks representing a (green), b (blue), and y (red) ions are labeled, and b and y ions are summarized in the sequence at the top of each spectrum. a) MS/MS spectrum of AF25, m/z 809.4. b) MS/MS spectrum of AF26, m/z 920.5. c) MS/MS spectrum of AF2, m/z 991.5. Insets in a and c show the same spectra with condensed X axis and lower scale Y axis. X axis: m/z is mass-to-charge ratio. Y axis is intensity of MS signal in arbitrary units, a.u.

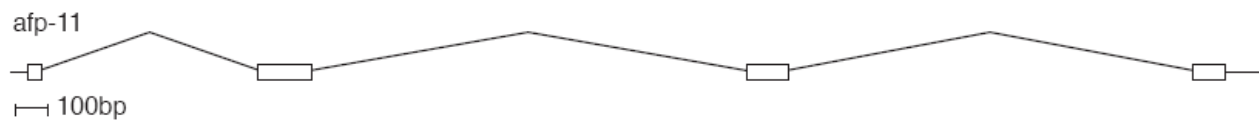

Supplemental Figure S3. Structure of the *afp-11* gene. There are 4 exons of 48, 184, 154 and 100 bp, separated by introns of 726, 1477, and 1313 bp. The 3'UTR is 125 bp in length.

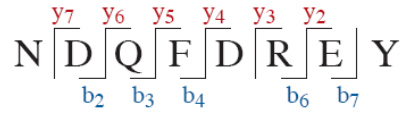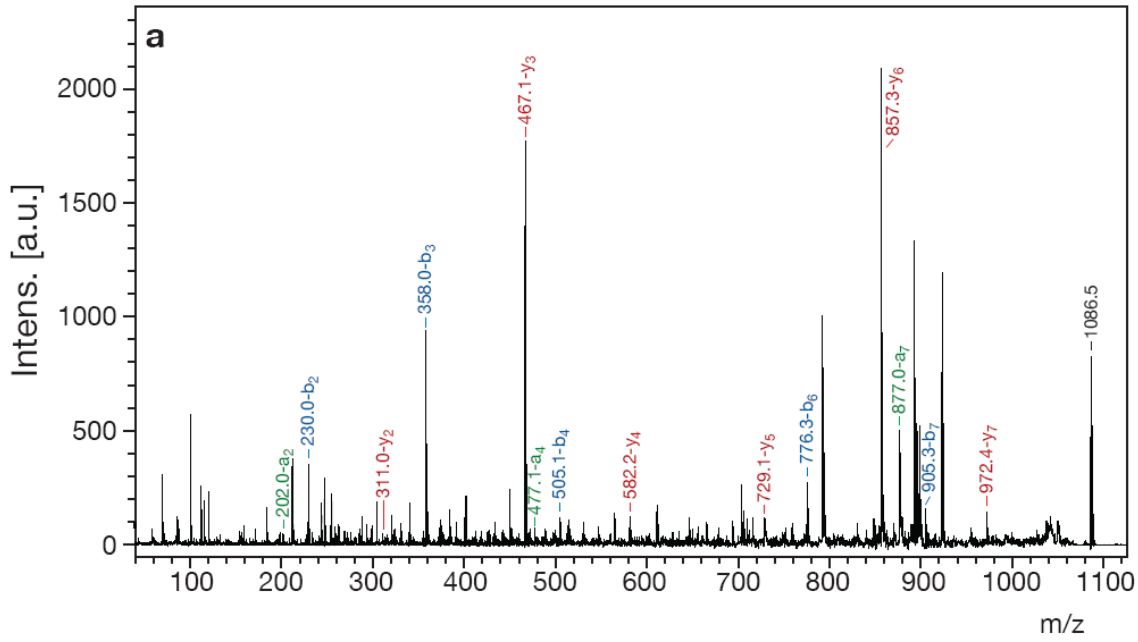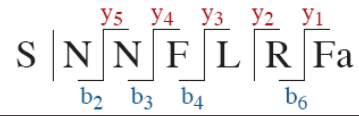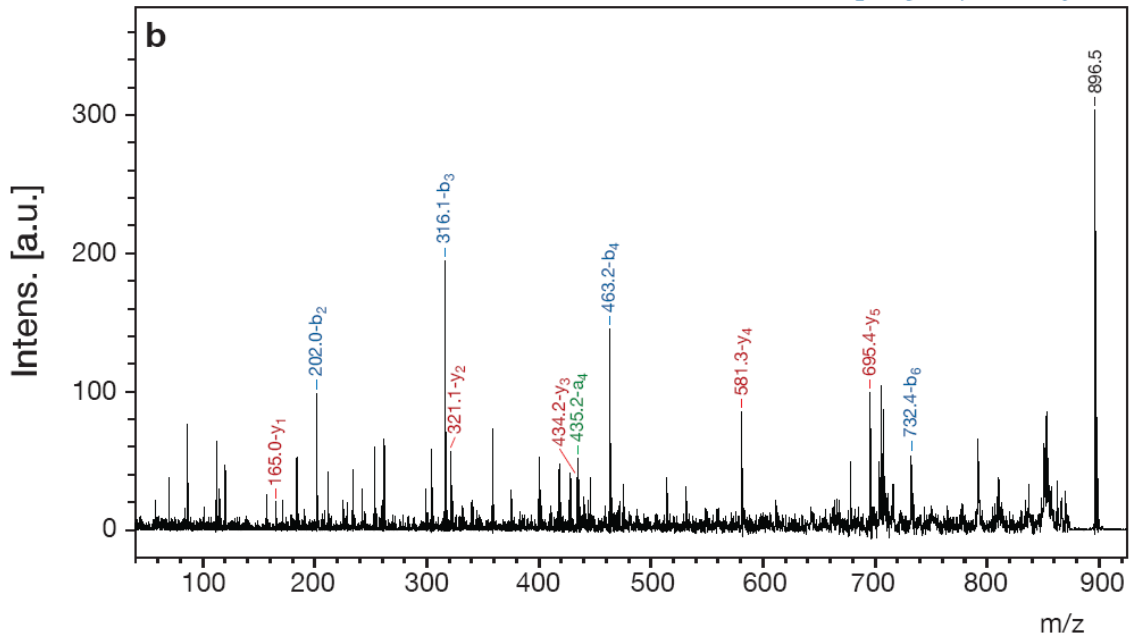



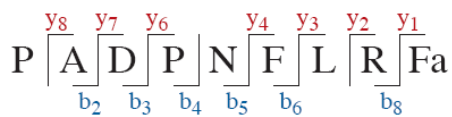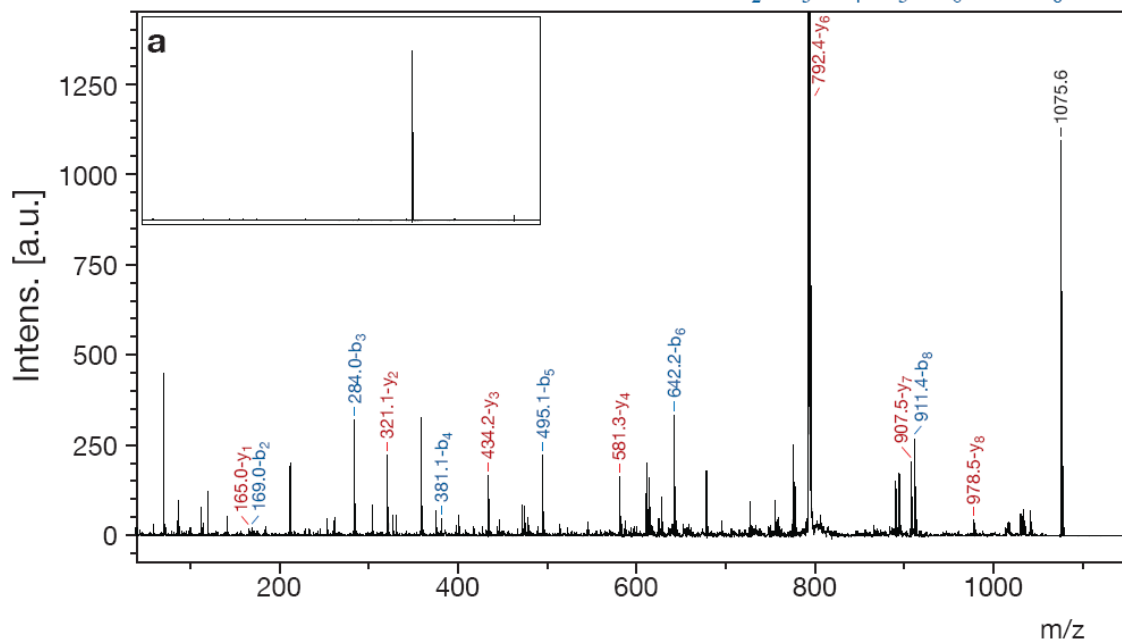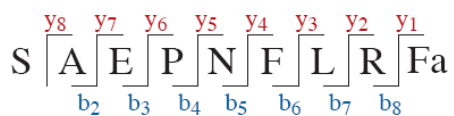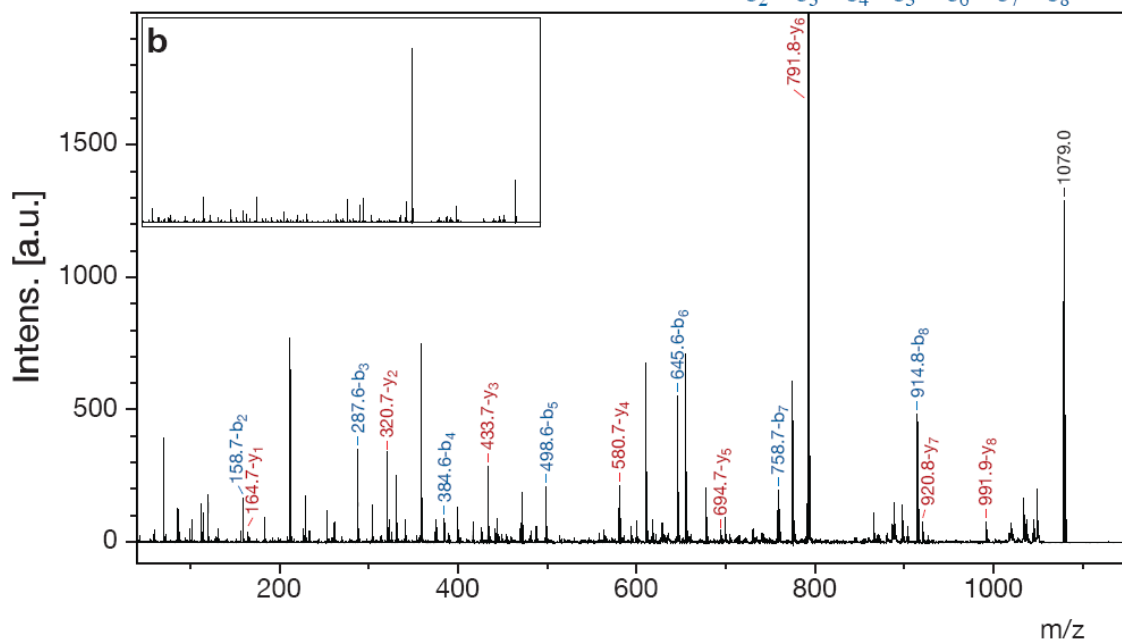

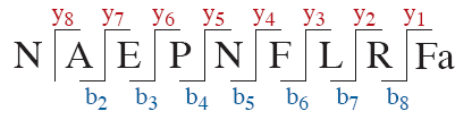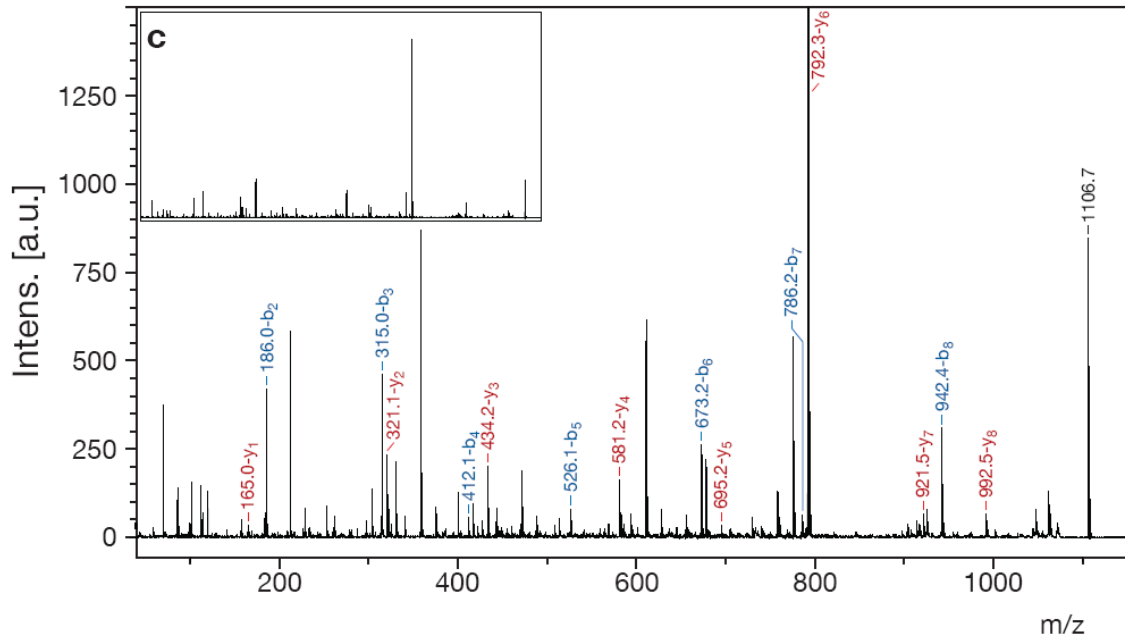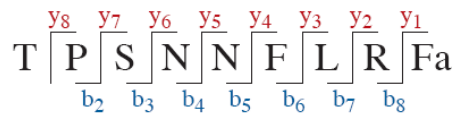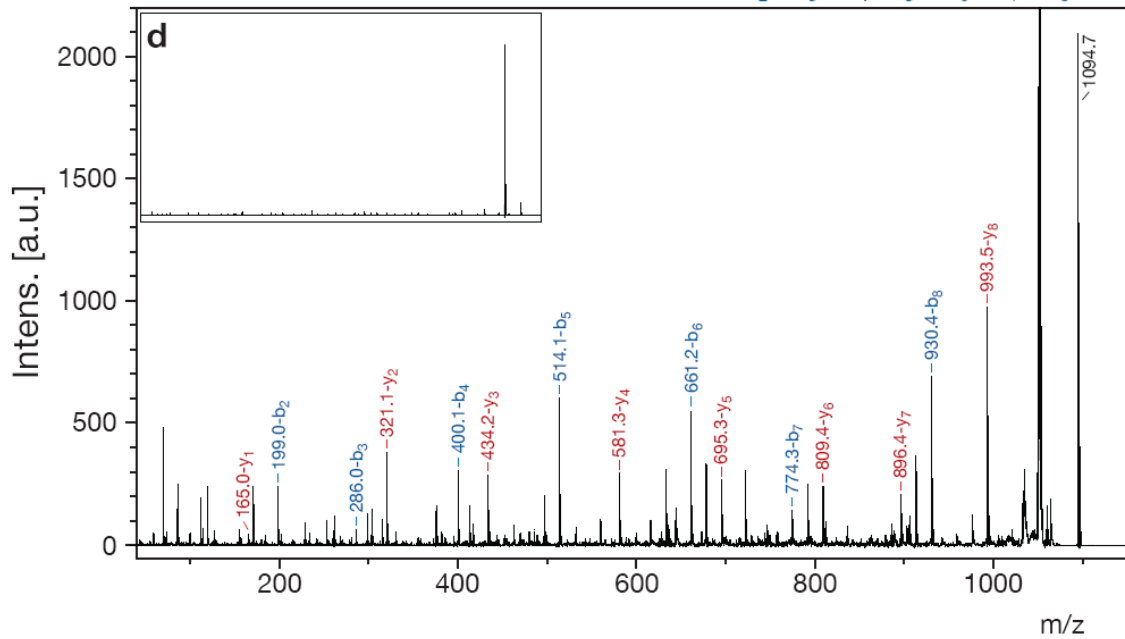





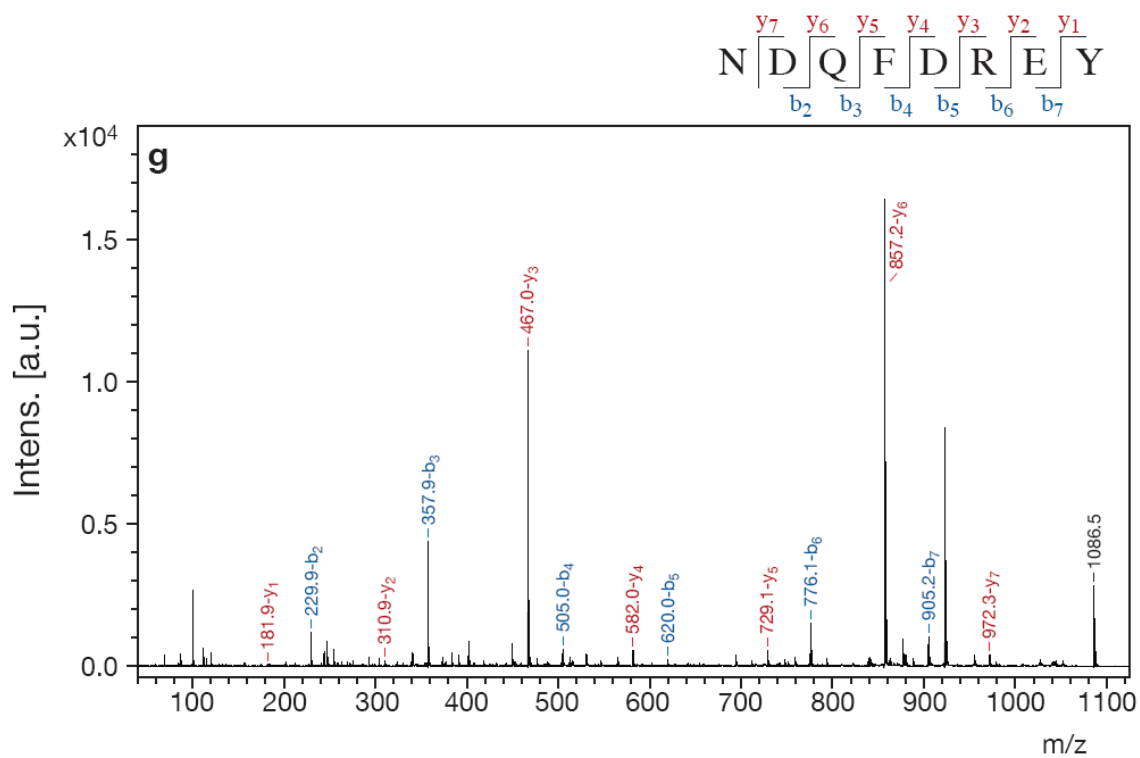

Supplemental Figure S5. MS/MS of synthetic novel peptides. Peaks representing b (blue) and y (red) ions are labeled, and b and y ions are summarized in the sequence at the top of each spectrum. a) MS/MS spectrum of AF27, m/z 1075.6. b) MS/MS spectrum of AF28, m/z 1079.6. c) MS/MS spectrum of AF29, m/z 1106.6. d) MS/MS spectrum of AF31, m/z 1094.6. e) MS/MS spectrum of AF32, m/z 1051.5. f) MS/MS spectrum of AF33, m/z 1223.6. g) MS/MS spectrum of PepNY, m/z 1086.4. Insets in a - e show the same spectra with condensed X axis and lower scale Y axis. X axis: m/z is mass-to-charge ratio. Y axis is intensity of MS signal in arbitrary units, a.u.

## References for Supplemental material

1. Cowden, C., and Stretton, A. O. (1993) AF2, an *Ascaris* neuropeptide: isolation, sequence, and bioactivity, *Peptides 14*, 423-430.
2. Cowden, C., and Stretton, A. O. (1995) Eight novel FMRFamide-like neuropeptides isolated from the nematode *Ascaris suum*, *Peptides 16*, 491-500.
3. Cowden, C., Stretton, A. O., and Davis, R. E. (1989) AF1, a sequenced bioactive neuropeptide isolated from the nematode *Ascaris suum*, *Neuron 2*, 1465-1473.
4. Davis, R. E., and Stretton, A. O. (1996) The motornervous system of *Ascaris*: electrophysiology and anatomy of the neurons and their control by neuromodulators, *Parasitology 113 Suppl*, S97-117.
5. Edison, A. S., Messinger, L. A., and Stretton, A. O. (1997) *afp-1*: a gene encoding multiple transcripts of a new class of FMRFamide-like neuropeptides in the nematode *Ascaris suum*, *Peptides 18*, 929-935.
6. Jarecki, J. L. (2010) Identification and localization of neuropeptides in *Ascaris suum* by mass spectrometry, *PhD thesis, University of Wisconsin-Madison*.
7. Jarecki, J. L., Andersen, K., Konop, C. J., Knickelbine, J. J., Vestling, M. M., and Stretton, A. O. (2010) Mapping neuropeptide expression by mass spectrometry in single dissected identified neurons from the dorsal ganglion of the nematode *Ascaris suum*, *ACS Chem Neurosci 1*, 505-519.
8. Nanda, J. C., and Stretton, A. O. (2010) In situ hybridization of neuropeptide-encoding transcripts *afp-1*, *afp-3*, and *afp-4* in neurons of the nematode *Ascaris suum*, *J Comp Neurol 518*, 896-910.
9. Viola, I. R. (2011) Comparing the cellular localization of *Ascaris* neuropeptides using immunocytochemistry, molecular biology and mass spectrometry, University of Wisconsin-Madison.
10. Yew, J. Y., Davis, R., Dikler, S., Nanda, J., Reinders, B., and Stretton, A. O. (2007) Peptide products of the *afp-6* gene of the nematode *Ascaris suum* have different biological actions, *J Comp Neurol 502*, 872-882.
11. Nanda, J. (2004) Molecular biological analysis of neuropeptide transcripts from the nematode *Ascaris suum*, *PhD thesis, University of Wisconsin-Madison*.
